# Supplementary material for: Bland and Altman agreement method: to plot differences against means or differences against standard? An endless tale?
Source: publisher site journal article supplement (doi:10.1515/cclm-2023-0306), 2023-09-06
Supplement: Supplementary file 1 [file j_cclm-2023-0306_suppl_001.docx]

Example 1.

In the paper of Bland and Altman [13, Bland JM, Altman DG. Measuring agreement in method comparison studies. Stat Methods Med Res 1999; 8: 135–160.] there are several analyses of dataset. We have selected the data shown in Table “Table 2 Measurements of plasma volume expressed as a percentage of normal in 99 subjects, using two alternative sets of normal values due to Nadler and Hurley (data supplied by C Dore´, see Cotes et al.21) for showing an example of the application of the equations shown in the paper.

We add also for readers’ easiness the comment about these data in the Bland and Altman paper: “The data are plotted in Figure 4(a). It can be seen immediately that the two methods give systematically different readings, and that all the observations lie above the line of equality. It is less easy to see that the differences increase as the plasma volume rises, but a plot of difference versus mean shows such an effect very clearly (Figure 4b)

By knowing the variances and the means: Nadler (test) = Var_T = 230.415 and mean_T = 98.5010; Hurley (standard) = Var_S = 192.990 and mean_S = 89.2384, together with their correlation coefficient (rTS) equal to 0.99024, it is possible to calculate the ratio of the variances and of the means given by: 1.19392 and 1.10380, respectively.

Furthermore, it is possible to calculate the correlation and regression coefficients of the model differences and means by applying the following formulas:

It has to be noted that it is very easy to carry out a statistical test on the correlation coefficient (r) with a null hypothesis of: H0:  = 0. Indeed, the correlation coefficient divided by the square root of the ratio between (1 - r2) and (n - 2), is distributed as a random variable Student’s t with n - 2 degrees of freedom. Particularly, the test statistic is:

So, it easy to obtain: and to conclude for the rejection of the above reported null hypothesis since a quantile t value of 5.2973 leaves a bilateral probability of <0.0001. So, rejecting the null hypothesis of no correlation it has to conclude that the differences and the means are correlated as the expression of a proportional error of the two measurement methods. However, it is not possible to separate the component due to the different variances (leading to a spurious proportional error) from a real proportional error.

It has to be noted that the probability value can be calculated by means of the Microsoft Excel ® function “T.DIST.2T(x,deg_freedom)” where x is the value of the quantile of the t distribution (the 5.2973 value above reported) and the “deg_freedom” are the degrees of freedom equal to n – 2.

Then, the intercept (aDM) is calculated as:

The above results can be obtained also, apart from rounding error, by using the ratio of the two variances according to the following equations:

Furthermore, it is possible to calculate the correlation and regression coefficient of the model differences and standard by applying the following formulas

The above results can be obtained also, apart from rounding error, by using the ratio of the two variances as:

Again, the test statistic can be calculated as: with an associated bilateral p value from the Microsoft Excel ® function T.DIST.2T of 7.14274E-07 (practically P<0.0001).

So, it is possible to see that also in this case with a moderate value of the ratio between the two variances (1.19392) and a high value of the correlation coefficient between the two measurement methods (r = 0.99024) a statistically significant result of the test H0:  = 0 is obtained, leading to conclude for the presence of an important proportional error. In this case, the coefficient correlation and regression of the two models (differences vs. means and differences vs. standard) are very similar leading to a not definite choice between them. Nevertheless, the model differences vs. standard show a bit lower spurious proportional error.

Indeed, in the Bland and Altman paper[13] these data have been reanalysed after a logarithmic transformation that successfully removed the proportional error (for the DM model the correlation and regression coefficients are equal to -0.02337 and -0.00318, respectively and for the DS model, the correlation and regression coefficients are equal to 0.04465 and 0.00607, respectively).

Then, the intercept (aDS) is calculated as:

It has to be considered that the estimate of the intercept (1.9450) for the differences and standard model is almost twice the estimate (0.9084) obtained from the differences and means model. This allows us to conclude that the DS model overestimates the systematic error in comparison to the DM model. In any case the presence of a systematic error and a proportional error has been also underlined in the Bland and Altman paper (see the aforementioned comment).

Example 2.

The paper by Ferraro et al. [14] shows an agreement analysis to “investigate the inter-method bias between the Roche Cobas e801, which was taken as the reference method as aforementioned, and three other more widely commercialized methods used in clinical practice (Abbott Alinity i, Beckman Access Dxl, and Siemens Atellica) for tPSA measurement.”

We considered according to the paper the first set of determinations of the Roche method as the Standard even if it has a greater variability (Var_S = 77.0151 and mean_S = 8.5258) and, for example, the first set of the Beckman determination as the Test (Var_T = 58.1355 and mean_T = 7.3040) with a ratio between the variances and the means of 0.75486 and 0.85670, respectively. Finally, the correlation coefficient (rTS) is equal to 0.98051.

So, the correlation and regression coefficients of the DM model are:

The above results can be obtained also, apart from rounding error, by using the ratio of the two variances as:

The above results can be obtained also, apart from rounding error, by using the ratio of the two variances as:

It has to be noted that the correlation and regression coefficients for the DM model are greater than those calculated for the DS model; however, being more near to the 0, they give a lower estimate of the proportional error.

Then, the intercepts aDM and aDS are calculated as:

And:

Considering the systematic error, the DS model gives a lower estimate.

As a general conclusion for choosing between the two models: the closer the correlation coefficient and the regression coefficient are to zero, the less the presence of the proportional error is sustainable. Furthermore, the closer the intercept of the regression is to zero, the less the presence of the systematic error is sustainable.
